# Supplementary material for: Detection of Degenerative Changes on MR Images of the Lumbar Spine with a Convolutional Neural Network: A Feasibility Study
Source: MDPI journal article supplement (doi:10.3390/diagnostics11050902), 2021-05-19
Supplement: s1 [file s1]

Supplementary File

# Detection of Degenerative Changes on MR Images of the Lumbar Spine with a Convolutional Neural Network: A Feasibility Study

Nils Christian Lehnen <sup>1,2</sup>, Robert Haase <sup>1,2</sup>, Jennifer Faber <sup>3</sup>, Theodor Rüber <sup>4</sup>, Hartmut Vatter <sup>5</sup>, Alexander Radbruch <sup>1,2</sup> and Frederic Carsten Schmeel <sup>1,2,\*</sup>

<sup>1</sup> Department of Neuroradiology, University Hospital Bonn, Rheinische Friedrich-Wilhelms-Universität Bonn, 53127 Bonn, Germany; nils.lehnen@ukbonn.de (N.C.L.); robert.haase@ukbonn.de (R.H.); alexander.radbruch@ukbonn.de (A.R.)

<sup>2</sup> Research Group Clinical Neuroimaging, German Center for Neurodegenerative Diseases, 53127 Bonn, Germany

<sup>3</sup> Department of Neurology, University Hospital Bonn, Rheinische Friedrich-Wilhelms-Universität Bonn, 53127 Bonn, Germany; jennifer.faber@ukbonn.de

<sup>4</sup> Department of Epileptology, University Hospital Bonn, Rheinische Friedrich-Wilhelms-Universität Bonn, 53127 Bonn, Germany; theodor.rueber@ukbonn.de

<sup>5</sup> Department of Neurosurgery, University Hospital Bonn, Rheinische Friedrich-Wilhelms-Universität Bonn, 53127 Bonn, Germany; Hartmut.vatter@ukbonn.de

\* Correspondence: Carsten.Schmeel@ukbonn.de; Tel: +49-0228-28716507; Fax: +49-0228-28714321

**Citation:** Lehnen, N.C.; Haase, R.; Faber, J.; Rüber, T.; Vatter, H.; Radbruch, A.; Schmeel, F.C. Detection of Degenerative Changes on MR Images of the Lumbar Spine with a Convolutional Neural Network: A Feasibility Study. *Diagnostics* **2021**, *11*, 902. <https://doi.org/10.3390/diagnostics11050902>

Academic Editor: Thomas Baum;  
Nico Sollmann

Received: 28 April 2021

Accepted: 17 May 2021

Published: 19 May 2021

**Publisher's Note:** MDPI stays neutral with regard to jurisdictional claims in published maps and institutional affiliations.

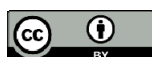

**Copyright:** © 2021 by the authors. Licensee MDPI, Basel, Switzerland. This article is an open access article distributed under the terms and conditions of the Creative Commons Attribution (CC BY) license (<http://creativecommons.org/licenses/by/4.0/>).

**Table S1.** CNN diagnostic performance at 1.5T. TP: True positive; TN: True negative; FP: False positive; FN: False negative; PPV: Positive predictive value; NPV: Negative predictive value.

| Characteristic     | Herniation | Extrusion | Stenosis  | Bulging    | Nerve Root Compression | Spondylolisthesis |
|--------------------|------------|-----------|-----------|------------|------------------------|-------------------|
| <b>n</b>           | 57 (8.8%)  | 33 (5.1%) | 27 (4.2%) | 91 (14.0%) | 43 (5.7%)              | 14 (2.2%)         |
| <b>TP</b>          | 44         | 29        | 20        | 49         | 28                     | 12                |
| <b>TN</b>          | 514        | 523       | 616       | 444        | 654                    | 560               |
| <b>FP</b>          | 77         | 92        | 5         | 113        | 59                     | 74                |
| <b>FN</b>          | 13         | 4         | 7         | 42         | 15                     | 2                 |
| <b>Sensitivity</b> | 77.19%     | 87.88%    | 74.07%    | 53.85%     | 65.12%                 | 85.71%            |
| <b>Specificity</b> | 86.97%     | 85.04%    | 99.20%    | 79.71%     | 91.73%                 | 88.33%            |
| <b>Accuracy</b>    | 86.11%     | 85.19%    | 98.15%    | 76.08%     | 90.21%                 | 88.27%            |
| <b>PPV</b>         | 36.36%     | 23.97%    | 80.00%    | 30.25%     | 32.18%                 | 13.95%            |
| <b>NPV</b>         | 97.53%     | 99.24%    | 98.88%    | 91.36%     | 97.76%                 | 99.64%            |
| <b>p</b>           | < 0.001    | < 0.001   | 0.77      | < 0.001    | < 0.001                | < 0.05            |

**Table S2.** CNN diagnostic performance at 3T.

| Characteristic     | Herniation | Extrusion | Stenosis | Bulging    | Nerve Root Compression | Spondylolisthesis |
|--------------------|------------|-----------|----------|------------|------------------------|-------------------|
| <b>n</b>           | 20 (8.3%)  | 13 (5.4%) | 8 (3.3%) | 42 (17.5%) | 16 (5.7%)              | 6 (2.5%)          |
| <b>TP</b>          | 14         | 12        | 7        | 20         | 14                     | 4                 |
| <b>TN</b>          | 199        | 204       | 228      | 158        | 242                    | 202               |
| <b>FP</b>          | 21         | 92        | 4        | 40         | 22                     | 32                |
| <b>FN</b>          | 6          | 4         | 1        | 22         | 2                      | 2                 |
| <b>Sensitivity</b> | 70.00%     | 92.31%    | 87.50%   | 47.62%     | 87.50%                 | 66.67%            |
| <b>Specificity</b> | 90.46%     | 89.87%    | 98.28%   | 79.80%     | 91.67%                 | 86.32%            |
| <b>Accuracy</b>    | 88.75%     | 90.00%    | 97.92%   | 74.17%     | 91.43%                 | 85.83%            |
| <b>PPV</b>         | 40.00%     | 34.29%    | 63.64%   | 33.33%     | 38.89%                 | 11.11%            |
| <b>NPV</b>         | 97.07      | 99.51%    | 99.56%   | 87.78%     | 99.18%                 | 99.02%            |
| <b>p</b>           | < 0.05     | < 0.05    | 0.37     | < 0.05     | < 0.001                | < 0.05            |
